# Supplementary material
Source: PubMed Central journal article supplement (PMC7641171)
Supplement: 41431_2020_652_MOESM2_ESM.pdf [file 41431_2020_652_MOESM2_ESM.pdf]

| Table S2   |                          |                                                                                                                                                |       |
|------------|--------------------------|------------------------------------------------------------------------------------------------------------------------------------------------|-------|
| Chromosome | Gene                     | Function                                                                                                                                       | Reads |
| 6          | Intergenic               |                                                                                                                                                | 1179  |
| 14         | FOXG1                    | Mutant allele (c.688C>T)                                                                                                                       | 586   |
| 20         | BFSP1 (intronic region)  | Encodes the protein Filensin in humans                                                                                                         | 309   |
| 14         | FOXG1                    | Wild type allele                                                                                                                               | 187   |
| 14         | CEP128 (intronic region) | Encodes Centrosomal Protein 128                                                                                                                | 165   |
| 16         | Intergenic               |                                                                                                                                                | 99    |
| 1          | Intergenic               |                                                                                                                                                | 62    |
| 1          | DPYD (intronic region)   | Antisense RNA 1 (Non-Protein Coding)                                                                                                           | 49    |
| 20         | E2F1 (intronic region)   | Encodes the Transcription Factor E2F1 playing an important role in the control of cell cycle                                                   | 44    |
| 9          | SARDH (intronic region)  | Encodes the mitochondrial enzyme Sarcosine Dehydrogenase that catalyzes the oxidative demethylation of sarcosine                               | 31    |
| 12         | BICD1 (intronic region)  | Encodes the protein Bicaudal Homolog 1 implicated in COPI-independent membrane transport from the Golgi apparatus to the endoplasmic reticulum | 27    |
| 11         | Intergenic               |                                                                                                                                                | 21    |
| 8          | Intergenic               |                                                                                                                                                | 16    |
| 12         | CCDC91 (intronic region) | Encodes the Coiled-coil Domain-containing protein 91 involved in the regulation of membrane traffic through the trans-Golgi network (TGN)      | 11    |
