# Supplementary material
Source: PubMed Central journal article supplement (PMC7641171)

a)

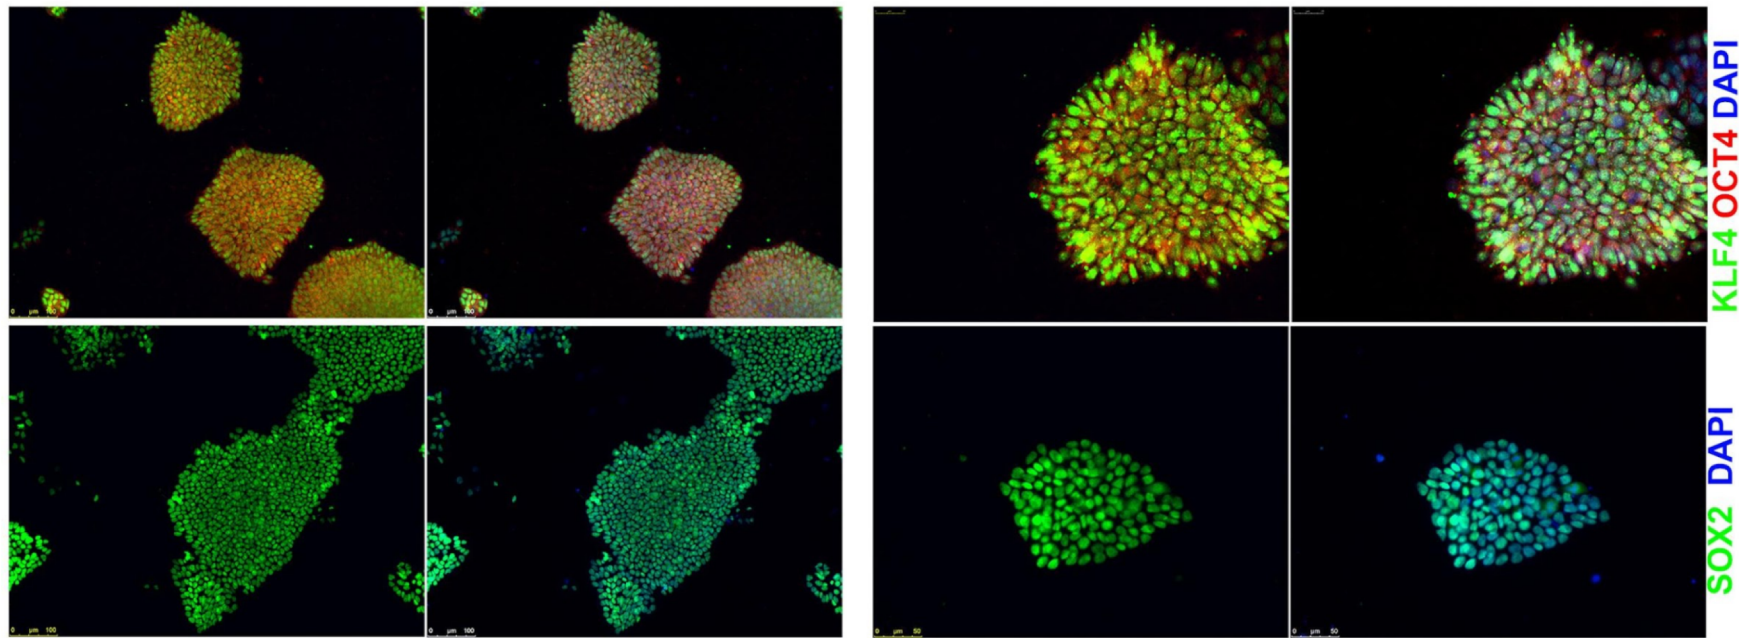

10X

20X

b)

Ectoderm

Mesoderm

Endoderm

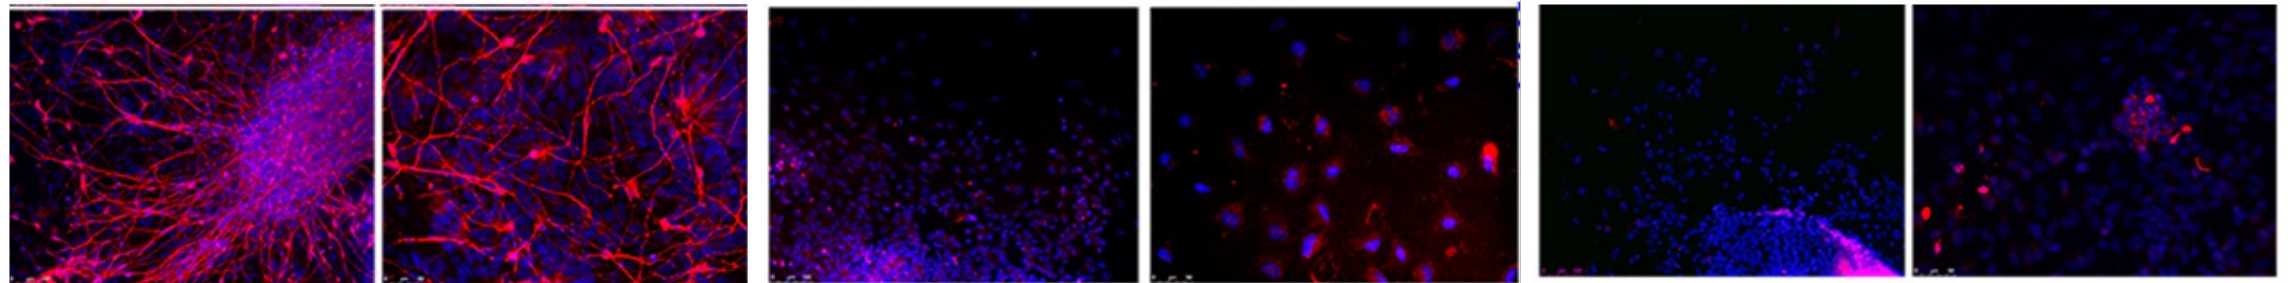

10X

20X

10X

20X

10X

20X

$\beta$ III-Tubulin DAPI

$\alpha$ SMA DAPI

GATA4 DAPI

c)

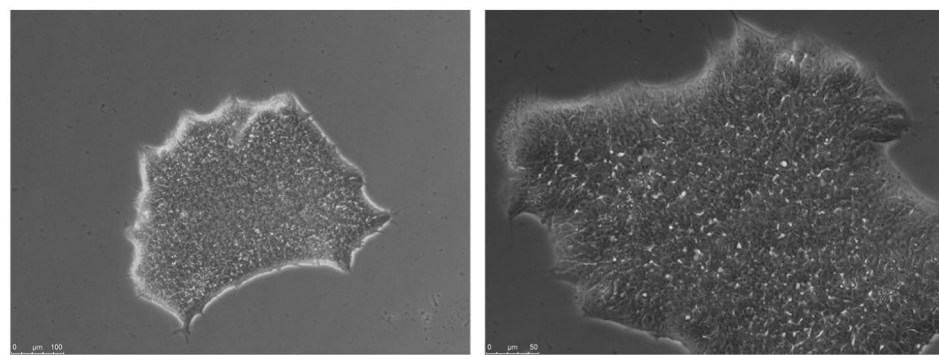

10X

20X

Supplement: 41431_2020_652_MOESM4_ESM.pdf [file 41431_2020_652_MOESM4_ESM.pdf]

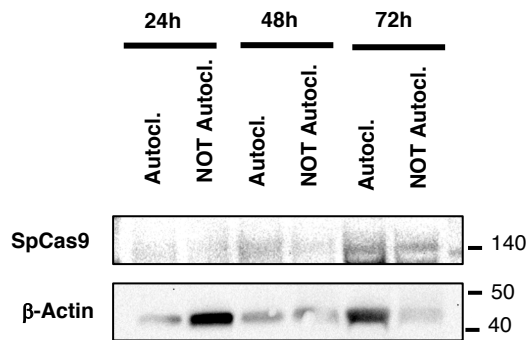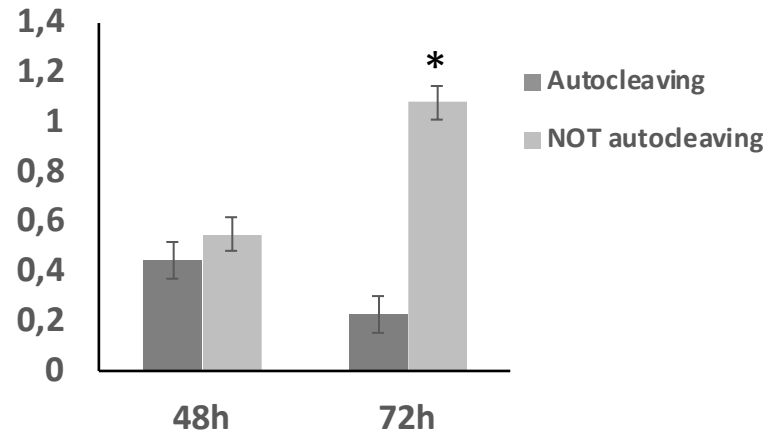

Supplement: 41431_2020_652_MOESM5_ESM.pdf [file 41431_2020_652_MOESM5_ESM.pdf]

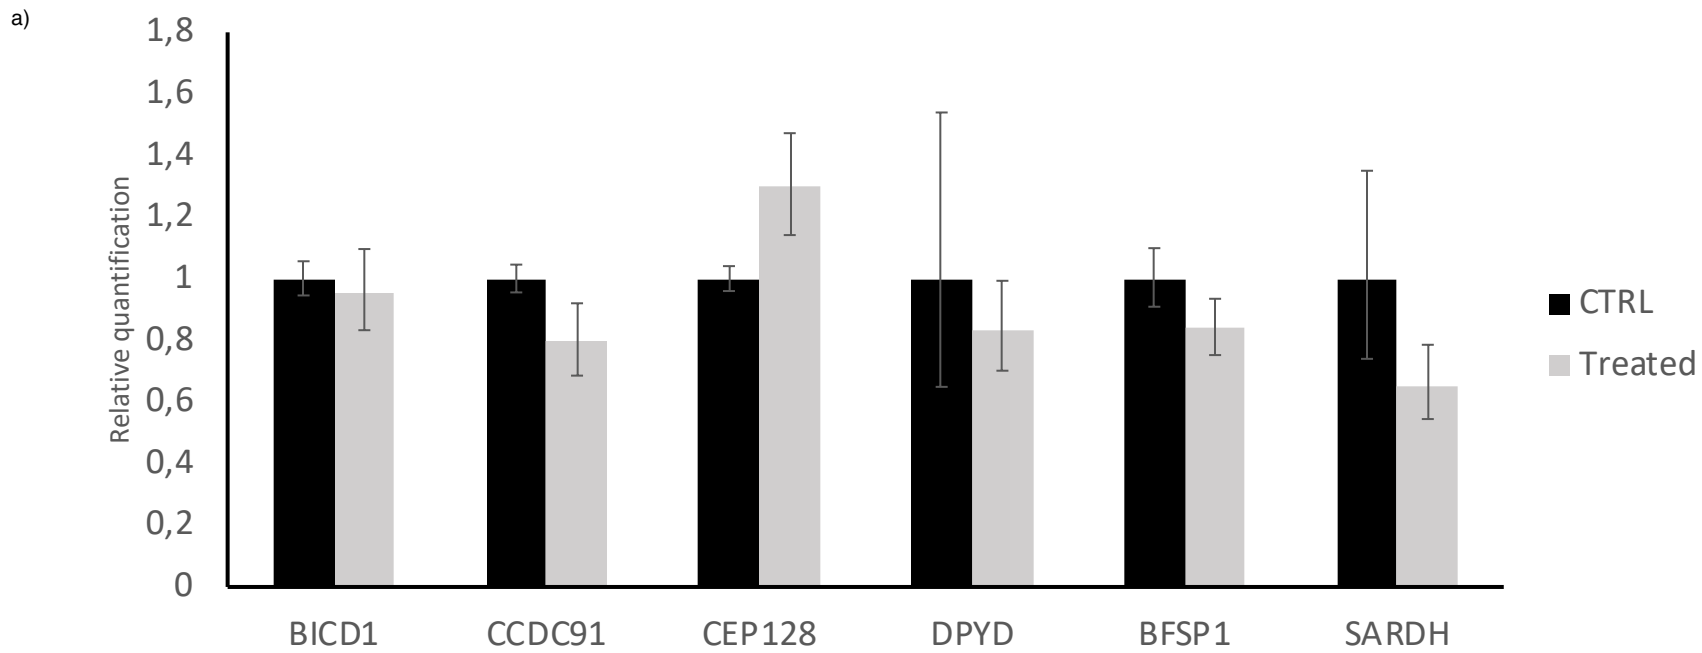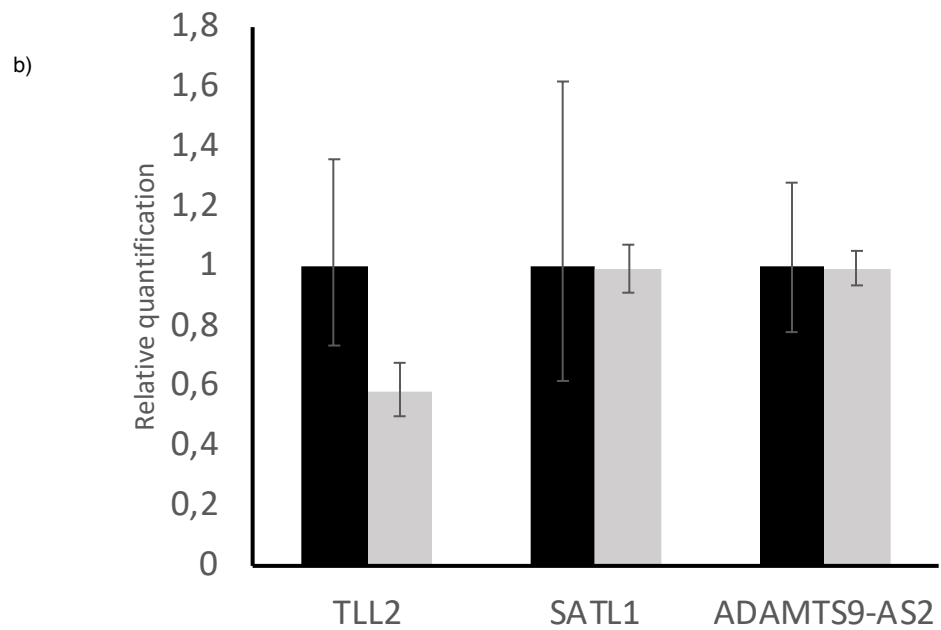

Supplement: 41431_2020_652_MOESM6_ESM.pdf [file 41431_2020_652_MOESM6_ESM.pdf]

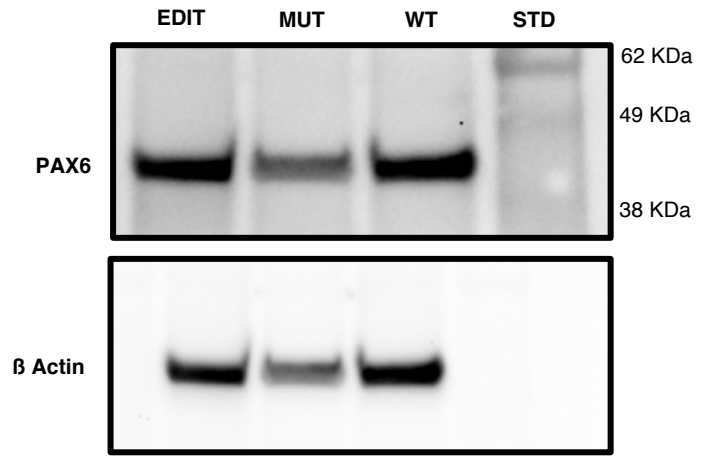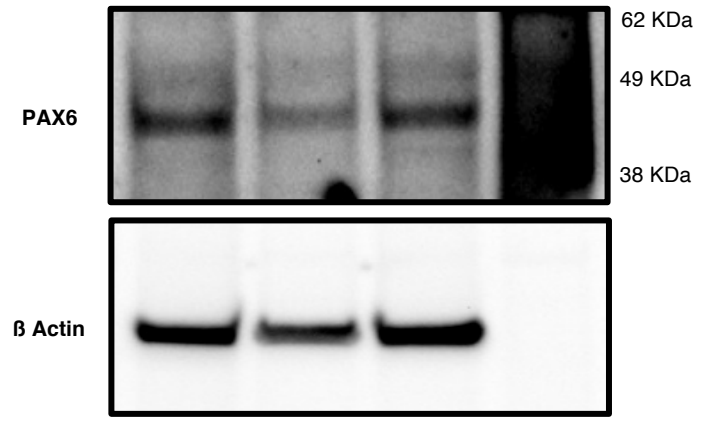

Supplement: 41431_2020_652_MOESM7_ESM.pdf [file 41431_2020_652_MOESM7_ESM.pdf]
